# Supplementary material for: Loss of Ku’s DNA end binding activity affects telomere length via destabilizing telomere-bound Est1 rather than altering TLC1 homeostasis
Source: bioRxiv preprint, doi:10.1101/600197, version 2 (2019-07-02)
Supplement: Supplentary Information and Figures S1-S18 [file 600197_file09.pdf]

## **Supplementary Information**

Loss of Ku's DNA end binding activity affects telomere length via destabilizing telomere-bound Est1 rather than altering TLC1 homeostasis

Laramie D. Lemon<sup>1,2</sup>, Danna K. Morris<sup>2</sup>, and Alison A. Bertuch<sup>1,2,\*</sup>

<sup>1</sup>Graduate Program in Integrative Molecular and Biomedical Sciences, Baylor College of Medicine, Houston, TX, 77030, USA

<sup>2</sup>Department of Pediatrics, Baylor College of Medicine, Houston, TX, 77030, USA

\*Corresponding Author

Alison A. Bertuch, MD, PhD

1102 Bates, FC 1200

Houston, TX, 77030

Tel: 832-824-4579

FAX: 832-825-4651

abertuch@bcm.edu

**Supplementary Table S1.** Strains used in the study

| STRAIN  | GENOTYPE                                                                                                         | SOURCE     |
|---------|------------------------------------------------------------------------------------------------------------------|------------|
| YAB289  | <i>MATa ura3-52 lys2-801 ade2-101 trp-Δ1 his3-Δ200 leu2-Δ1</i>                                                   | [1]        |
| YAB200  | YAB289 <i>yku70Δ::KAN<sup>R</sup></i>                                                                            | This study |
| YAB470  | YAB289 <i>cdc13Δ::NAT<sup>R</sup> yku70Δ::HPH<sup>R</sup></i> pVL438                                             | [1]        |
| YAB471  | YAB289 <i>cdc13Δ::NAT<sup>R</sup></i> pVL438                                                                     | [1]        |
| YAB540  | YAB289 <i>yku70-R456E</i>                                                                                        | This study |
| YAB620  | YAB289 <i>cdc13Δ::NAT<sup>R</sup> yku70-R456E</i> pVL438                                                         | [1]        |
| YAB621  | YAB289 <i>yku80-135i</i>                                                                                         | [1]        |
| YAB766  | YAB289 <i>yku80Δ::NAT<sup>R</sup></i>                                                                            | [1]        |
| YAB852  | YAB289 <i>tlc1Δ::KAN<sup>R</sup></i> pSD120                                                                      | This study |
| YAB928  | YAB289 <i>CDC13-G6-(FLAG)<sub>3</sub>::KAN<sup>R</sup> EST1-(MYC)<sub>13</sub>::HIS3 yku80Δ::HPH<sup>R</sup></i> | This study |
| YAB930  | YAB289 <i>CDC13-G6-(FLAG)<sub>3</sub>::KAN<sup>R</sup> EST1-(MYC)<sub>13</sub>::HIS3</i>                         | This study |
| YAB936  | YAB289 <i>EST1-(MYC)<sub>13</sub>::HIS3</i>                                                                      | This study |
| YAB937  | YAB289 <i>CDC13-G6-(FLAG)<sub>3</sub>::KAN<sup>R</sup> EST1-(MYC)<sub>13</sub>::HIS3 yku80-135i</i>              | This study |
| YAB958  | YAB289 <i>CDC13-G6-(FLAG)<sub>3</sub>::KAN<sup>R</sup> EST1-(MYC)<sub>13</sub>::HIS3 yku70Δ::KAN<sup>R</sup></i> | This study |
| YAB959  | YAB289 <i>EST1-(MYC)<sub>13</sub>::HIS3 yku70-R456E</i>                                                          | This study |
| YAB961  | YAB289 <i>CDC13-G6-(FLAG)<sub>3</sub>::KAN<sup>R</sup> EST1-(MYC)<sub>13</sub>::HIS3 yku70-R456E</i>             | This study |
| YAB1021 | YAB289 <i>sir4Δ::KAN<sup>R</sup></i>                                                                             | This study |
| YAB1023 | YAB289 <i>tlc1Δ48</i>                                                                                            | This study |
| YAB1024 | YAB289 <i>yku80-L111R</i>                                                                                        | This study |
| YAB1025 | YAB289 <i>yku80-L115A</i>                                                                                        | This study |
| YAB1027 | YAB289 <i>EST1-(MYC)<sub>13</sub>::HIS3 YKU80-(FLAG)<sub>3</sub>::KAN<sup>R</sup></i>                            | This study |
| YAB1028 | YAB289 <i>EST1-(MYC)<sub>13</sub>::HIS3 YKU80-(FLAG)<sub>3</sub>::KAN<sup>R</sup> yku70-R456E</i>                | This study |

**Supplementary Table S2.** Plasmids used in this study

| Plasmid | Genotype                                | Source     |
|---------|-----------------------------------------|------------|
| pAB198  | <i>CEN TRP1 yku70-R456E</i>             | [2]        |
| pAB830  | <i>2<math>\mu</math> URA3 ADH1-TLC1</i> | [1]        |
| pAB889  | <i>CEN URA3 yku80-135i</i>              | This study |
| pRS414  | <i>CEN TRP1</i>                         | [3]        |
| pRS416  | <i>CEN URA3</i>                         | [3]        |
| pRS426  | <i>2<math>\mu</math> URA3</i>           | [3]        |
| pSD120  | <i>CEN URA3 TLC1</i>                    | [4]        |
| pVL438  | <i>CEN URA3 CDC13</i>                   | [5]        |
| pVL648  | <i>CEN LEU2 CDC13</i>                   | [5]        |
| pVL1057 | <i>CEN TRP1 YKU70</i>                   | [6]        |
| pVL1069 | <i>CEN URA3 YKU80</i>                   | [7]        |
| pVL1091 | <i>CEN LEU2 CDC13-EST1</i>              | [5]        |

**References**

1. Williams, J.M., et al., *The principal role of Ku in telomere length maintenance is promotion of Est1 association with telomeres*. Genetics, 2014. **197**(4):1123-36.
2. Lopez, C.R., et al., *Ku must load directly onto the chromosome end in order to mediate its telomeric functions*. PLoS Genet, 2011. **7**(8):e1002233.
3. Christianson, T.W., et al., *Multifunctional yeast high-copy-number shuttle vectors*. Gene 1992. **110**(1):119-22.
4. Diede, S. J., and D.E. Gottschling, *Telomerase-mediated telomere addition in vivo requires DNA primase and DNA polymerases alpha and delta*. Cell, 1999. **99**(7):723-33.
5. Evans, S.K. and V. Lundblad, *Est1 and Cdc13 as comediators of telomerase access*. Science, 1999. **286**(5437):117-20.

6. Ribes-Zamora, A., et al., *Distinct faces of the Ku heterodimer mediate DNA repair and telomeric functions*. Nat Struct Mol Biol, 2007. **14**(4):301-7.
7. Bertuch, A.A. and V. Lundblad, *The Ku heterodimer performs separable activities at double-strand breaks and chromosome termini*. Mol Cell Biol, 2003. **23**(22):8202-15.

## **Supplementary Methods**

### **Protein solubility experiments**

Strains were grown at 28°C in 50 mL of YPD media to OD<sub>600</sub>=0.8. Extracts were lysed in TMG (10 mM Tris-HCl, pH 8.0, 1 mM MgCl<sub>2</sub>, 10% glycerol, 0.1 mM EDTA) plus 50 mM NaCl, PMSF (1:10 dilution), and Set III Protease inhibitor cocktail (Calbiochem, Millipore, 1:10 dilution) using acid washed glass beads. The supernatant (soluble fraction) was collected by centrifuging at 14000 RPM for 15 minutes at 4°C. The remaining cell debris pellet was resuspended in a solubilization buffer (20mM NaPO<sub>4</sub> buffer pH 8.0, 300 mM NaCl, 2% SDS, 2 mM DTT, 1% Triton X-100), PMSF (1:10 dilution), and Set III Protease inhibitor cocktail (Calbiochem, Millipore, 1:10 dilution) and the supernatant (insoluble fraction) was collected by centrifuging at 14000 RPM for 15 minutes at 4°C. Equal volume of soluble and insoluble fraction was run on a 7.5% polyacrylamide gel, transferred to an Immobilon-FL PVDF membrane (Millipore), and probed with  $\alpha$ -FLAG (Sigma F7425, 1:1000 dilution),  $\alpha$ -myc (Sigma M4439, 1:5000 dilution), and  $\alpha$ -PGK (Abcam ab113687, 1:5000 dilution) primary antibodies. Percent Cdc13 and Est1 was calculated per fraction.

Figure-S1 (Bertuch)

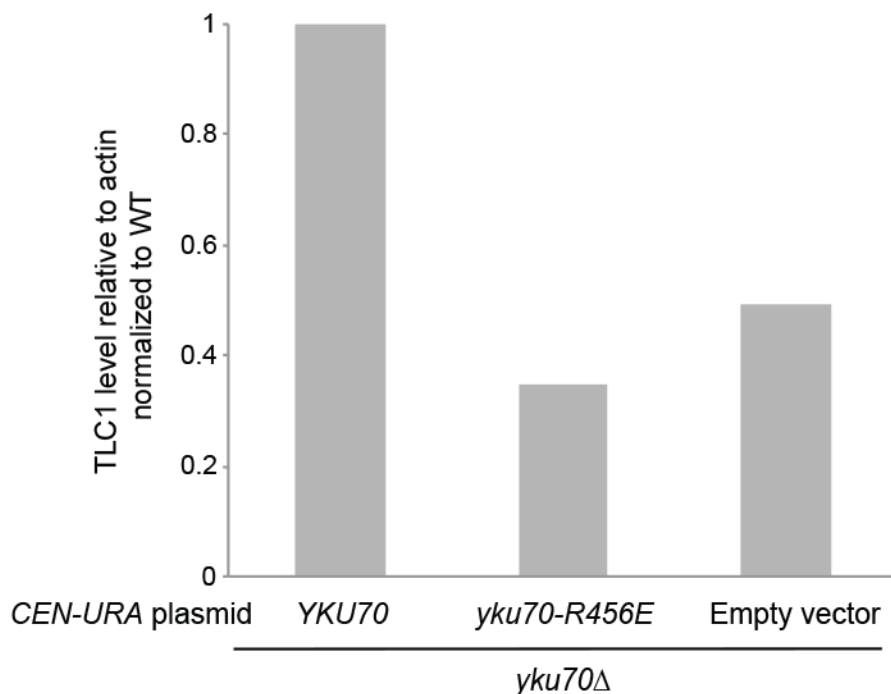

**Supplementary Figure S1. *YKU70* restores TLC1 levels in a *yku70Δ* strain while the *yku70-R456E* mutant fails to rescue TLC1 levels.** Quantification of TLC1 by RT-qPCR in asynchronous *yku70Δ* cells transformed with indicated plasmids. TLC1 levels were quantified relative to actin RNA and normalized to levels obtained for the *YKU70* CEN-URA transformed (WT) cells.

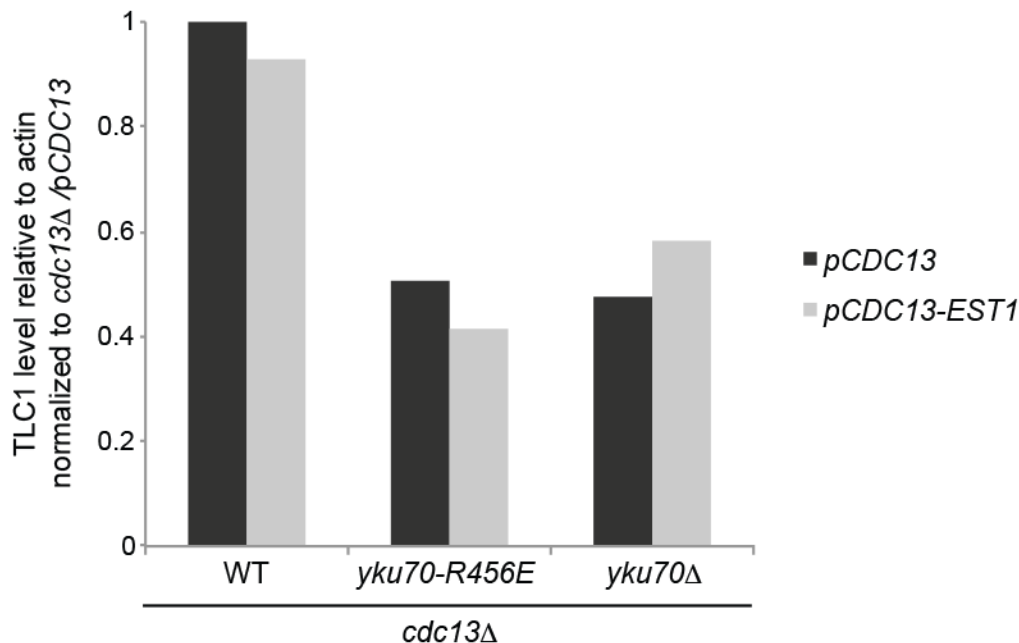

**Supplementary Figure S2. TLC1 levels are not stabilized in Ku mutant strains expressing a *CDC13-EST1* fusion.** RT-qPCR of TLC1 in asynchronous *cdc13*Δ *YKU70* (WT), *cdc13*Δ *yku70-R456E* and *cdc13*Δ *yku70*Δ strains expressing plasmid-borne *CDC13* or *CDC13-EST1* fusion.

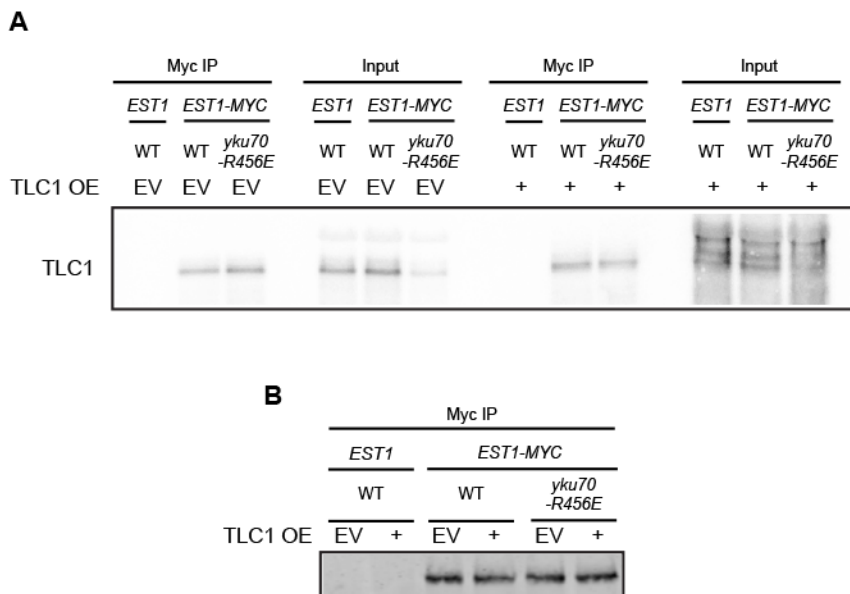

**Supplementary Figure S3. Est1-TLC1 interaction is not reduced in a *yku70-R456E* strain, with or without TLC1 overexpression.** Whole cell lysates from asynchronous cultures of strains with *EST1* or *EST1-MYC*, *YKU70* (WT) or *yku70-R456E*, and carrying either EV or TLC1 OE 2 micron plasmids, were immunoprecipitated with anti-myc and examined by northern blot for co-IP of TLC1 (A) or western blot to detect Est1-myc (B). Full-length blots are presented in Supplementary Figure S15.

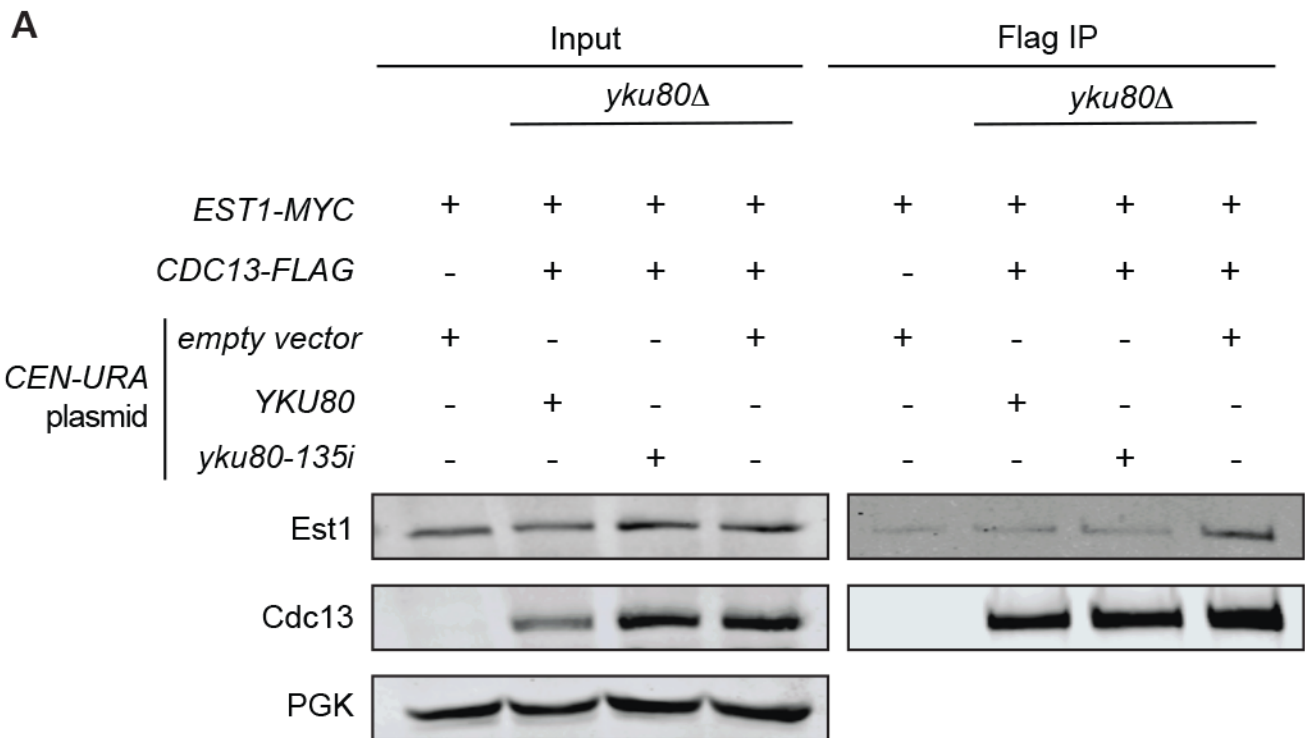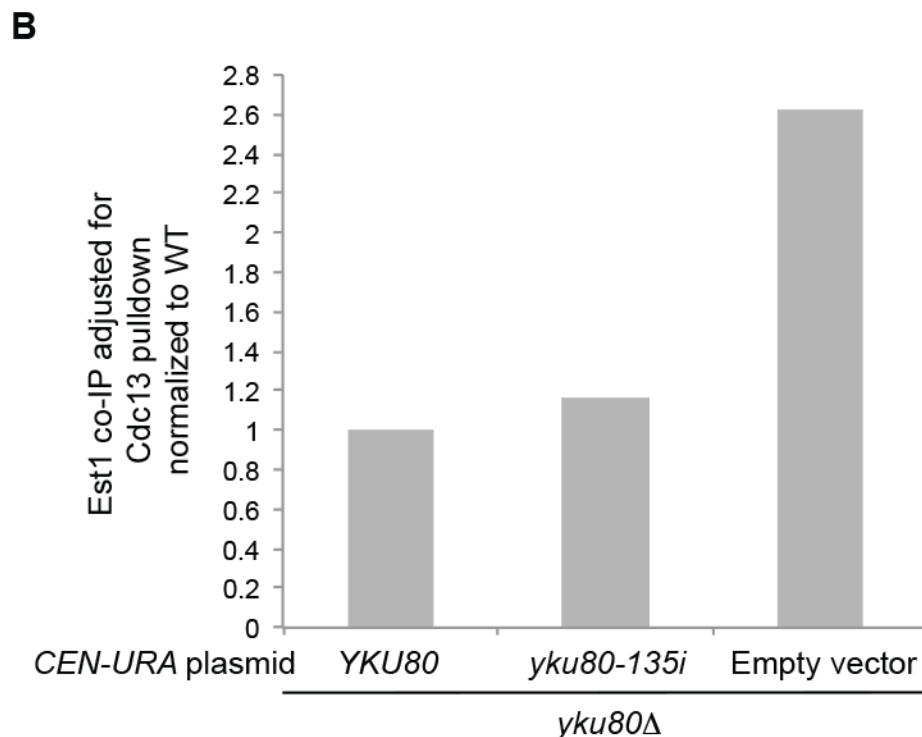

**Supplementary Figure S4. The Est1:Cdc13 interaction is rescued with *YKU80* plasmids.** (A) Co-immunoprecipitation of Est1-myc with Cdc13-FLAG in *yku80Δ* strains supplemented with indicated plasmids. Anti-FLAG immunoprecipitations were performed with whole cell lysate of asynchronous strains. Immunoprecipitates and inputs were analyzed by western blotting with  $\alpha$ -myc (Est1) and  $\alpha$ -FLAG (Cdc13). Inputs were also probed with  $\alpha$ -PGK for loading. Full length blots are presented in Supplementary Figure S14. (B) Quantification of Est1 associations relative to Cdc13 pull-down.

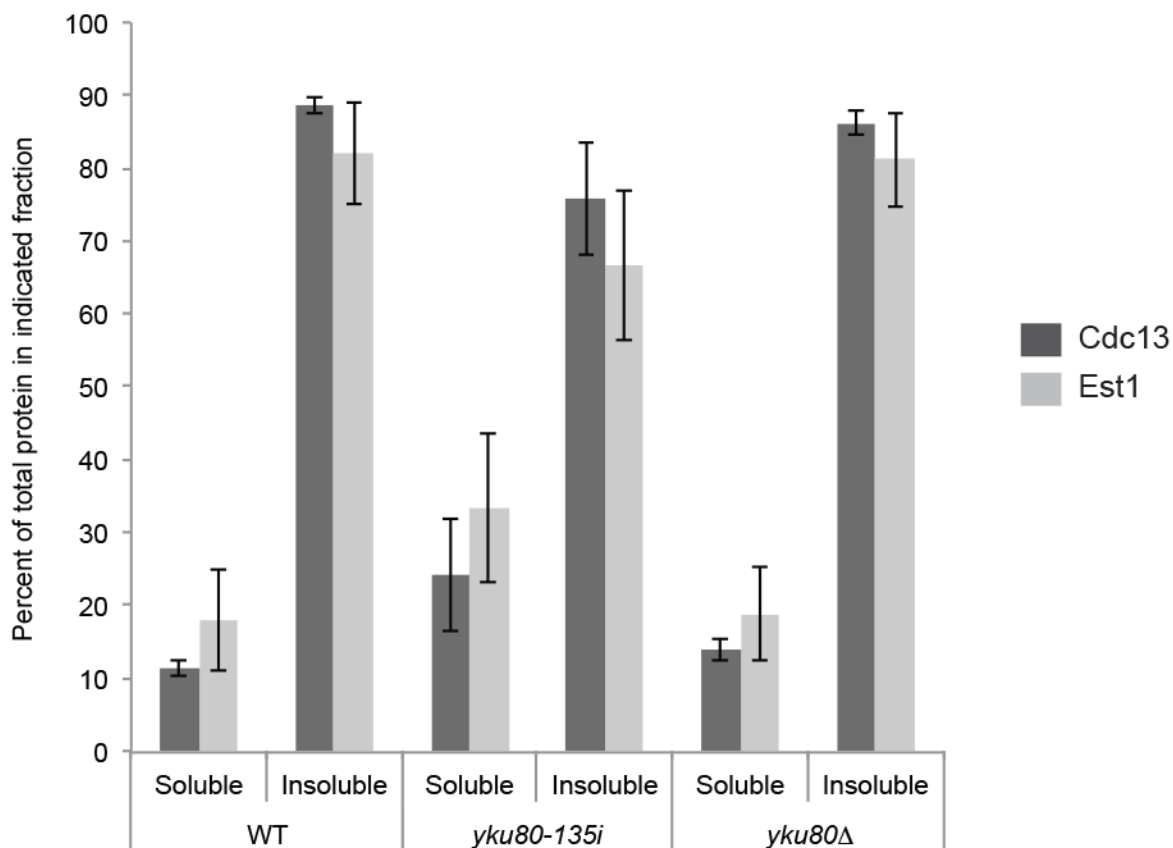

**Supplementary Figure S5. The increased Est1:Cdc13 interaction is not caused by changes in protein solubility.** Quantification of western blots for total Est1 and Cdc13 protein in soluble and insoluble fractions in three independent experiments. Indicated fractions were analyzed by western blotting with  $\alpha$ -myc (Est1) and  $\alpha$ -FLAG (Cdc13). Error bars represent  $\pm 1$  SEM.

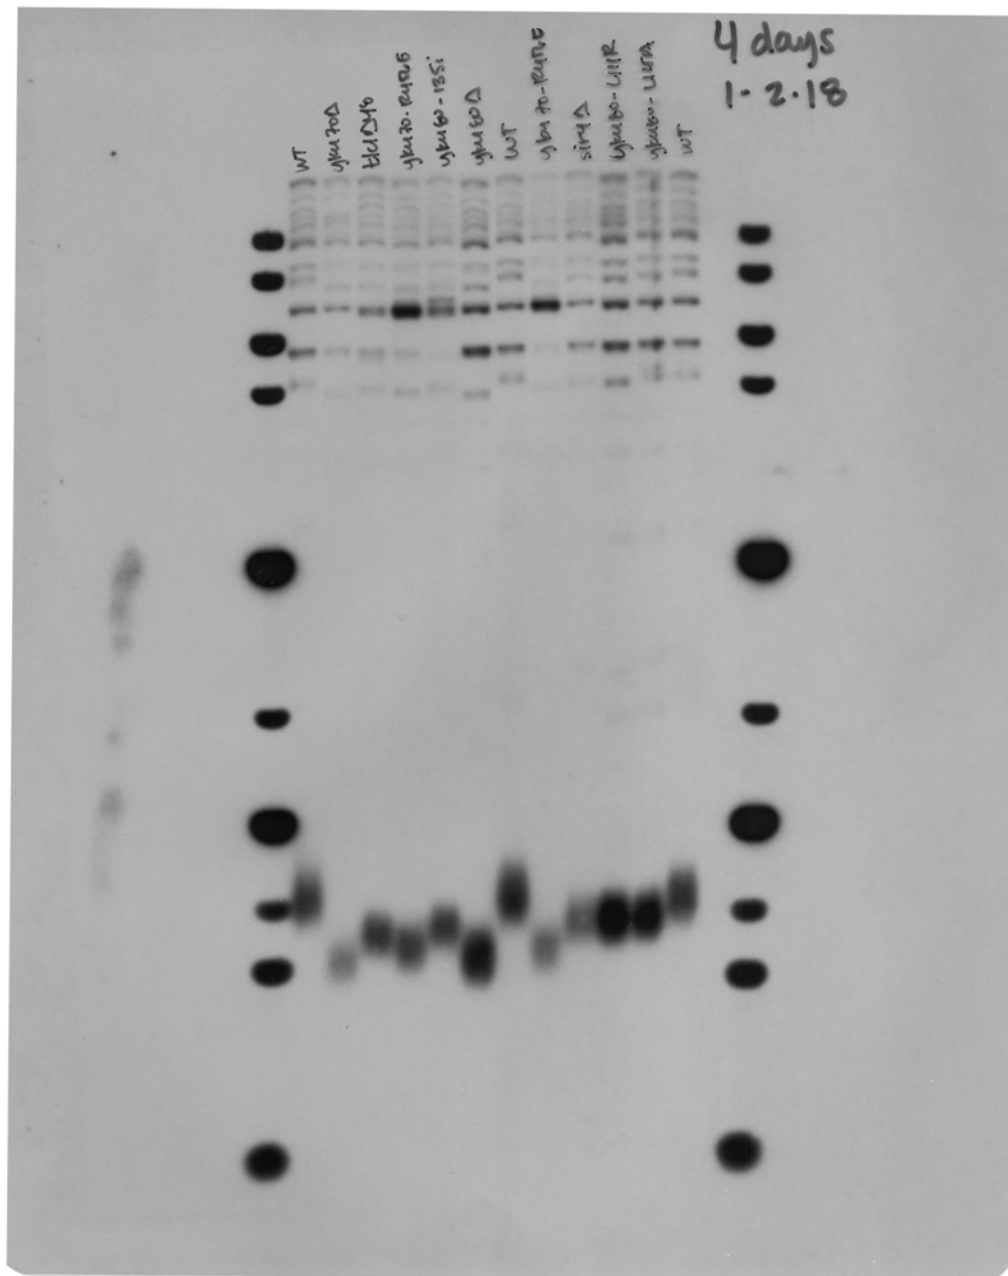

**Supplementary Figure S6.** Uncropped Southern blot shown in **Figure 1**.

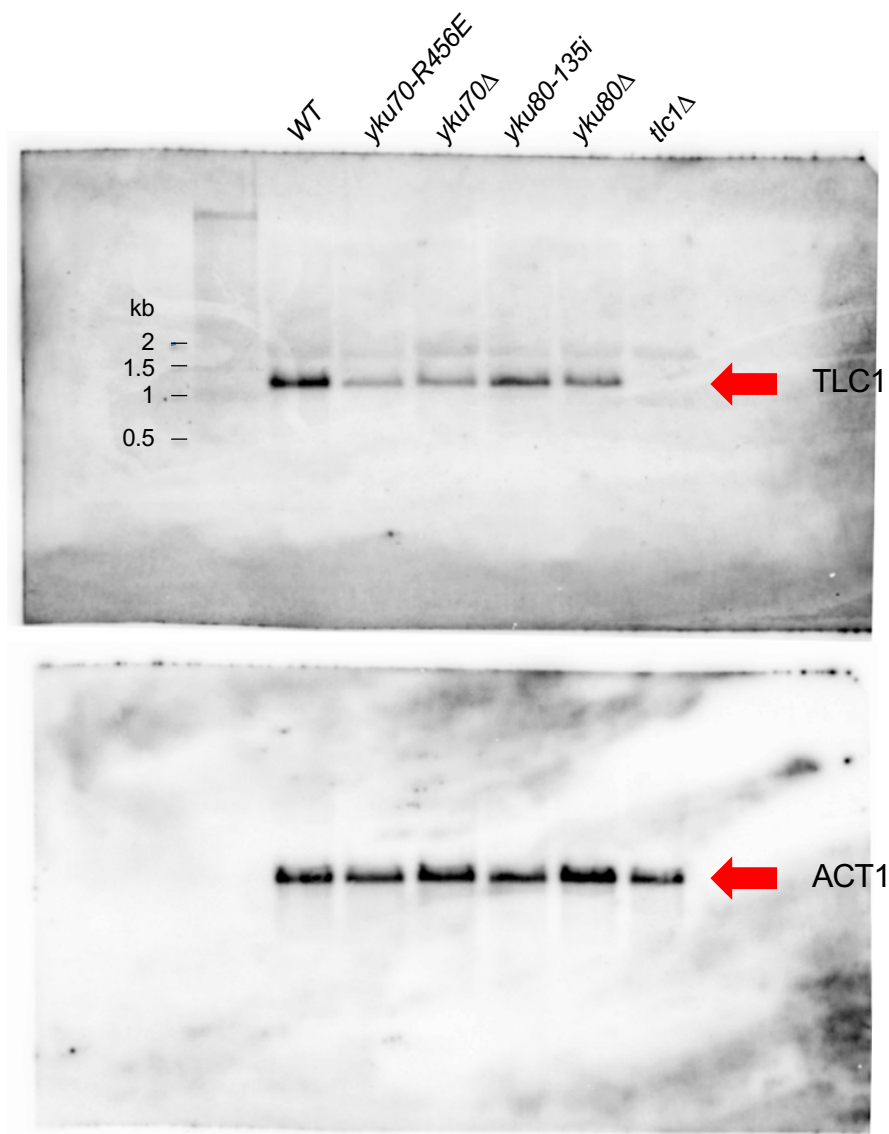

**Supplementary Figure S7.** Uncropped northern blots shown in **Figure 2B**.

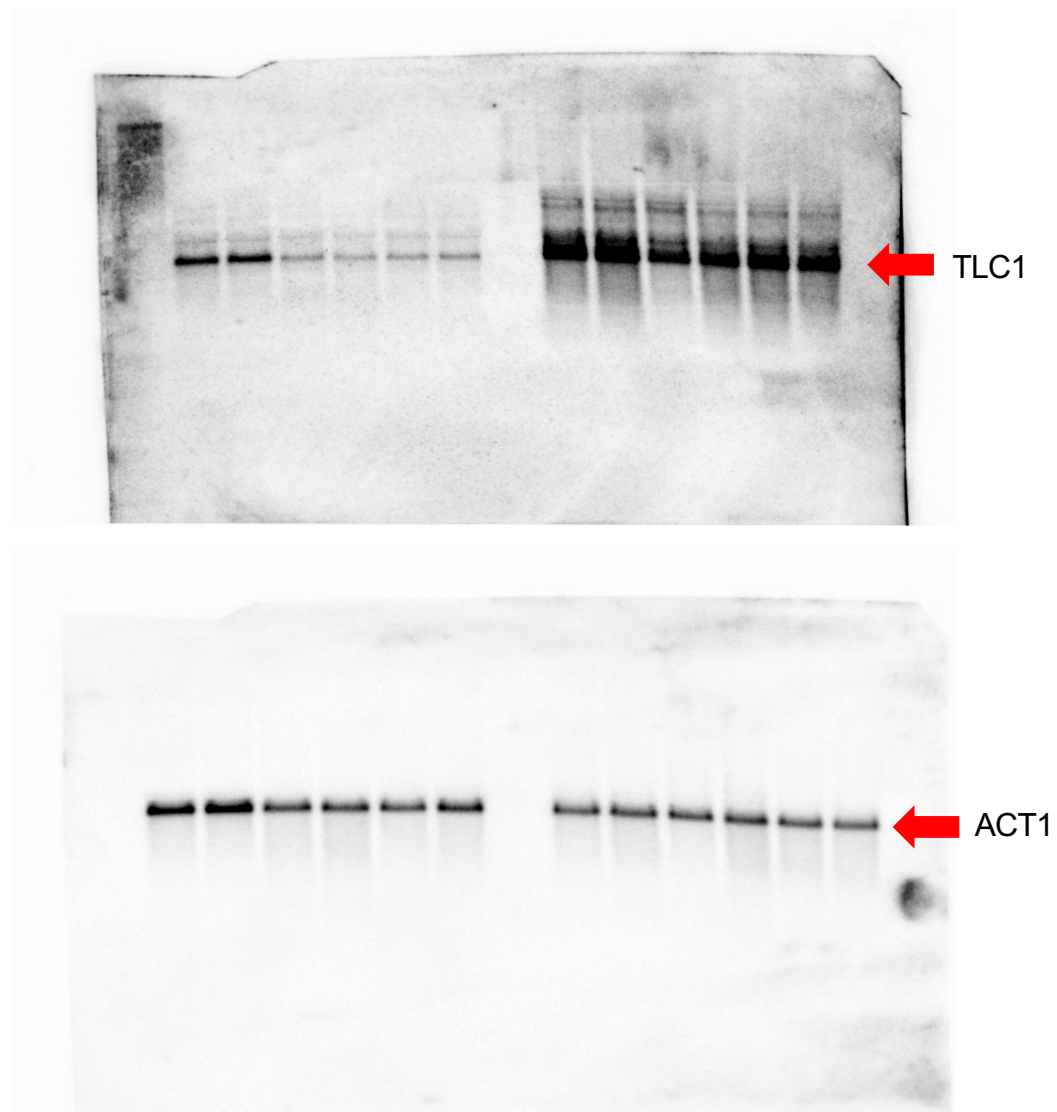

**Supplementary Figure S8.** Uncropped northern blots shown in **Figure 3A**.

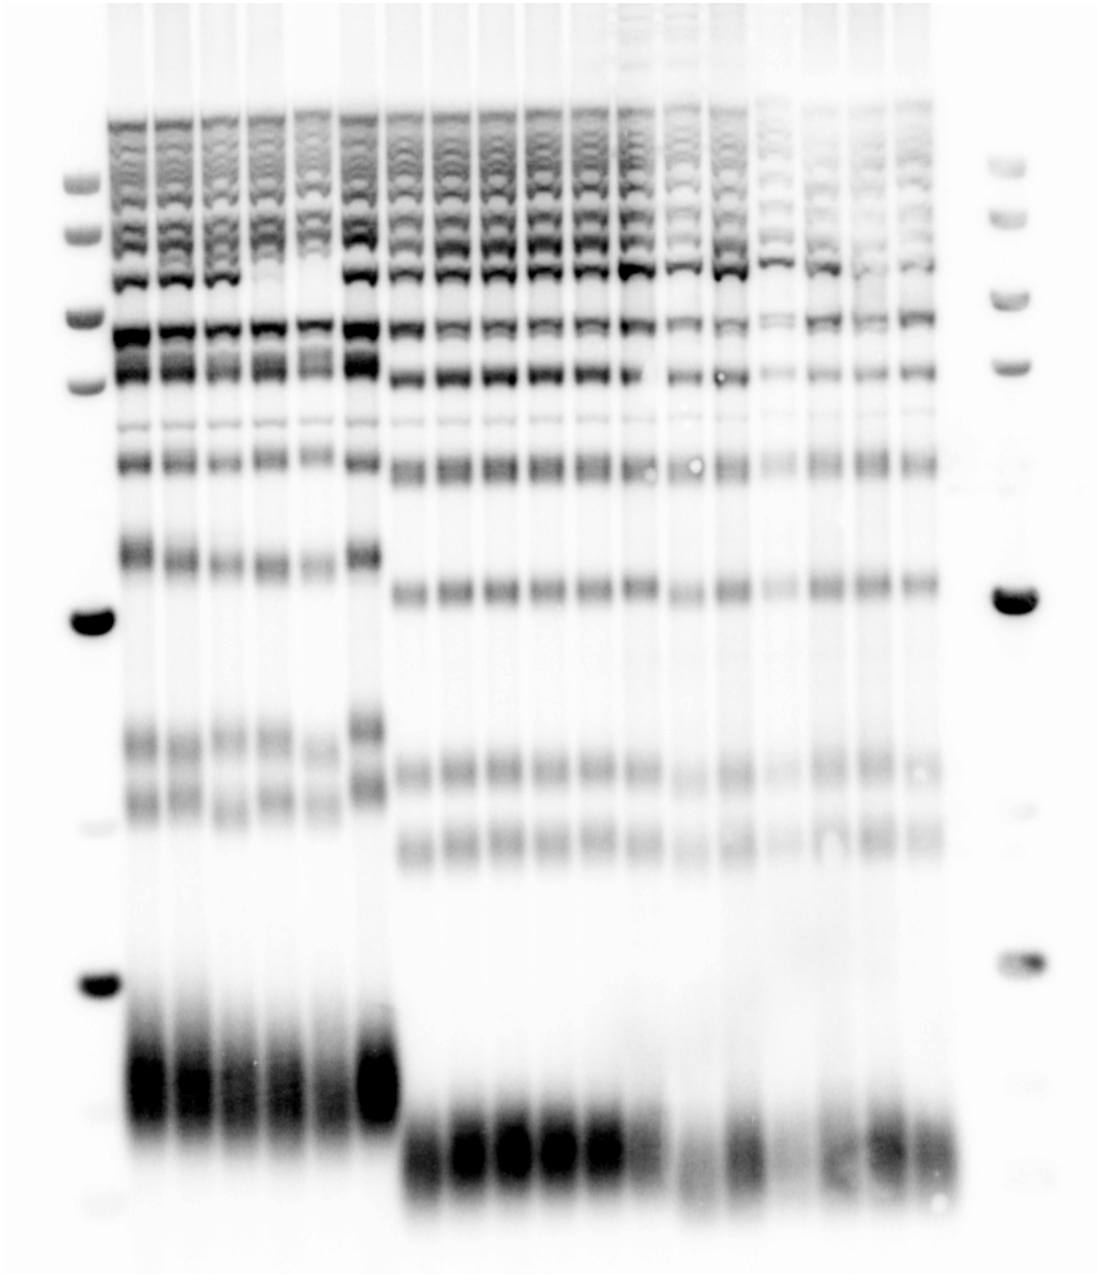

**Supplementary Figure S9.** Uncropped Southern blot shown in **Figure 3C**.

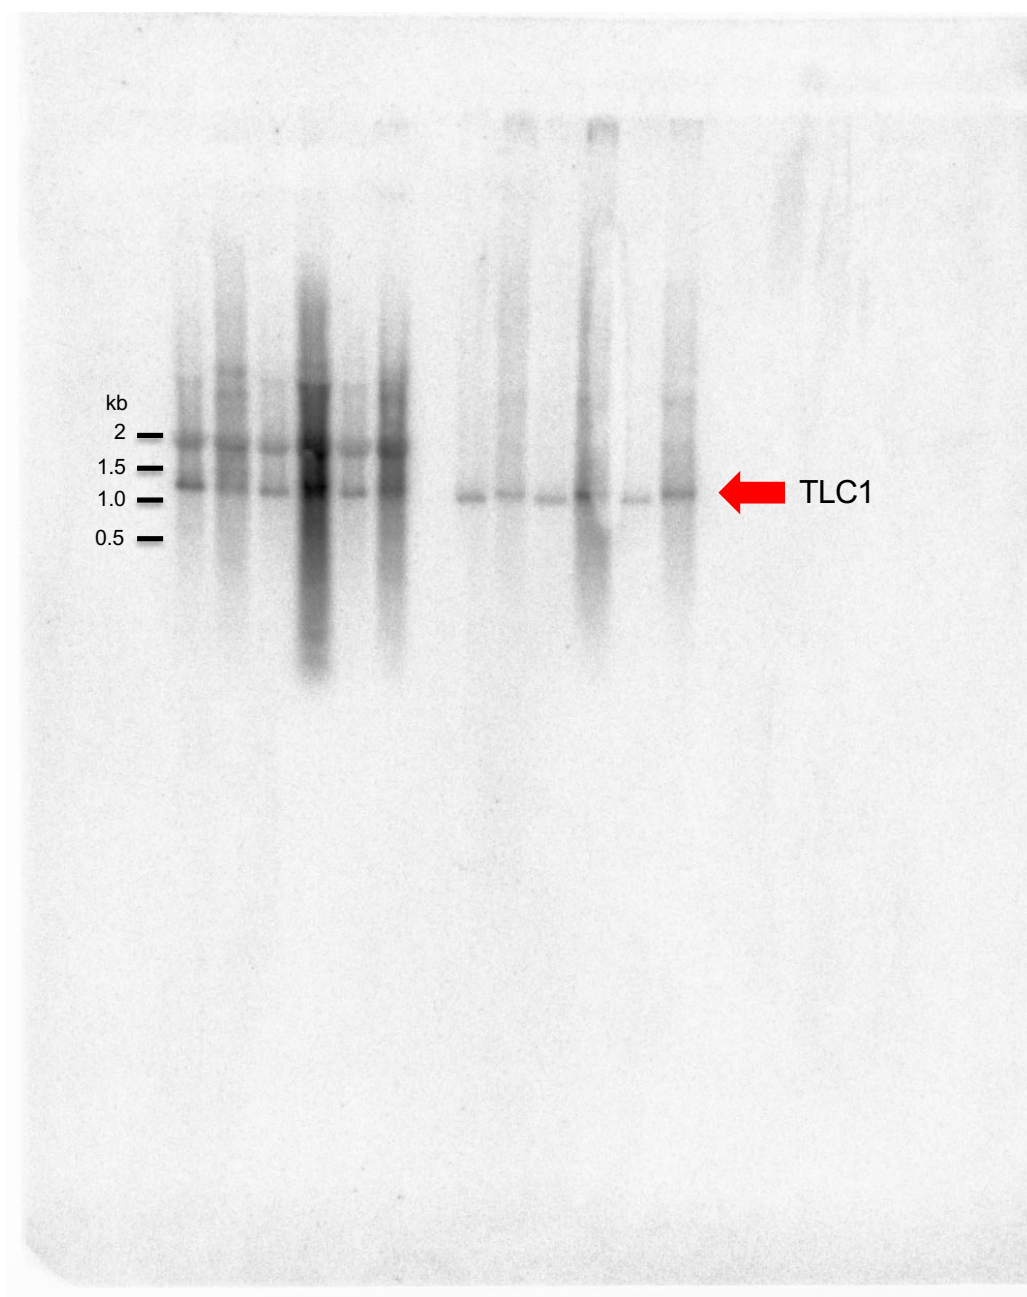

**Supplementary Figure S10A.** Uncropped TLC1 northern blot shown in **Figure 3D**.

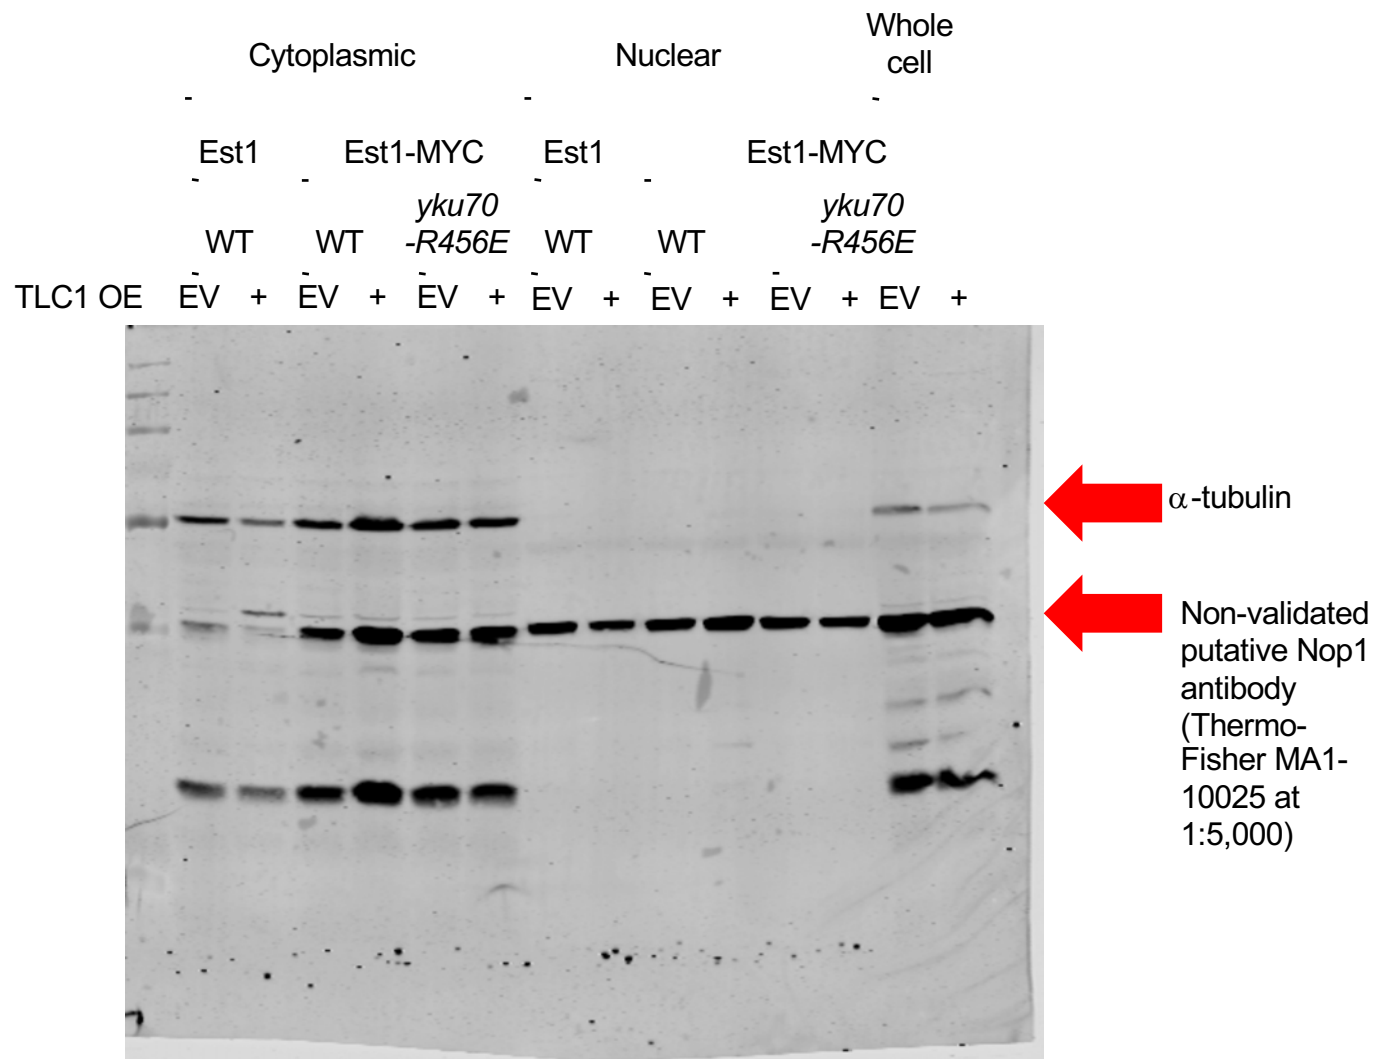

**Supplementary Figure S10B.** Uncropped western blot shown in **Figure 3D**.

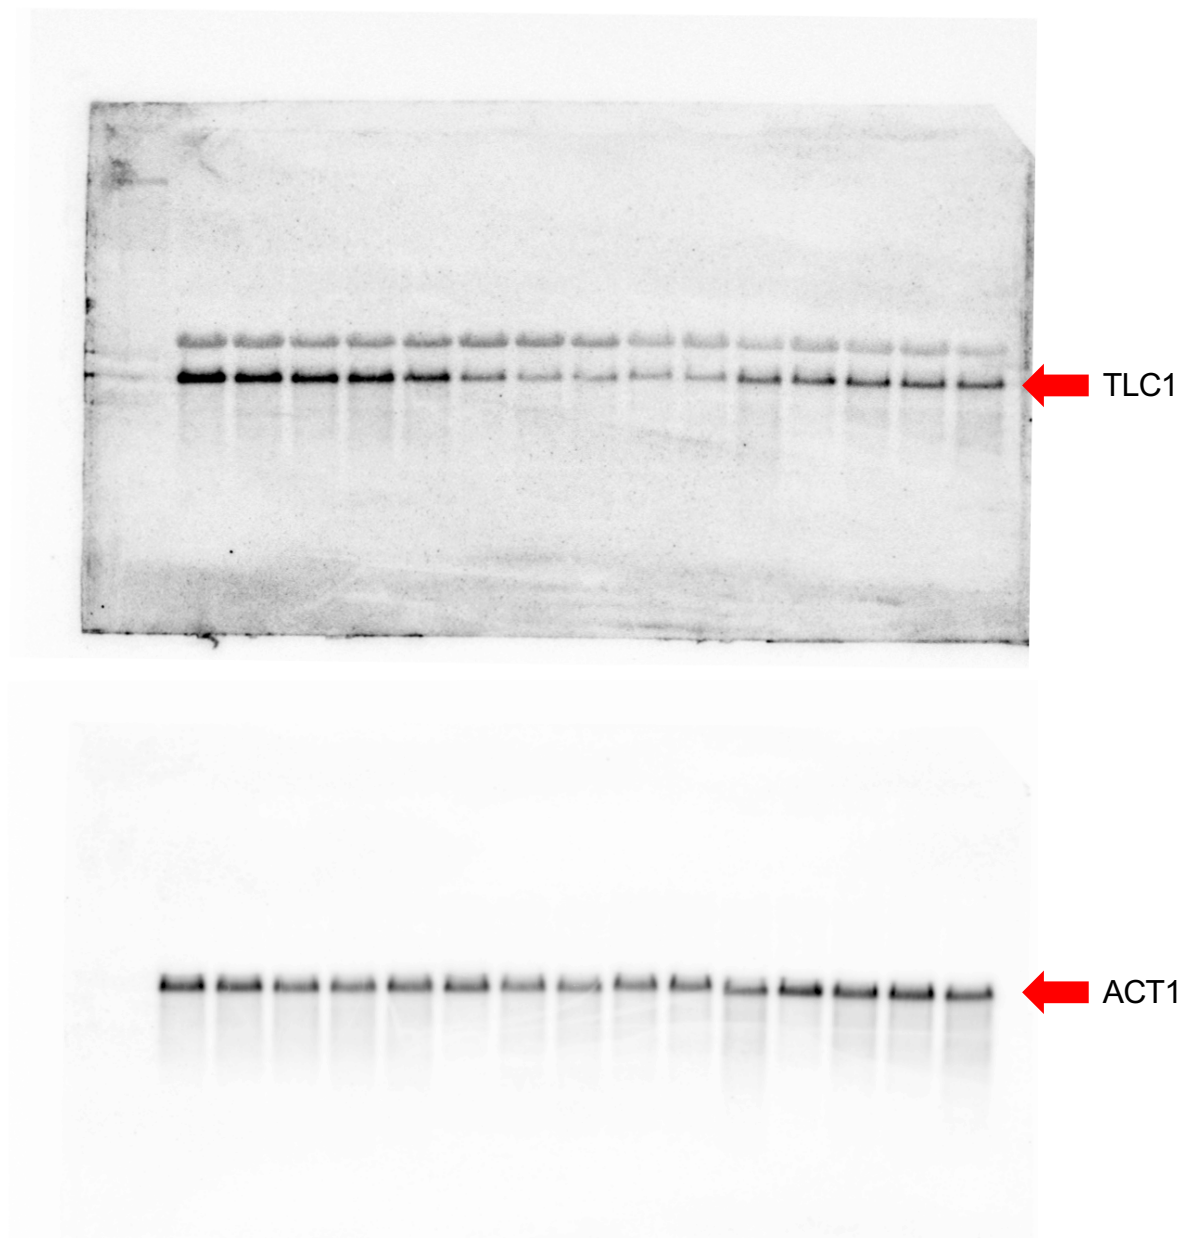

**Supplementary Figure S11.** Uncropped northern blots shown in **Figure 4A**.

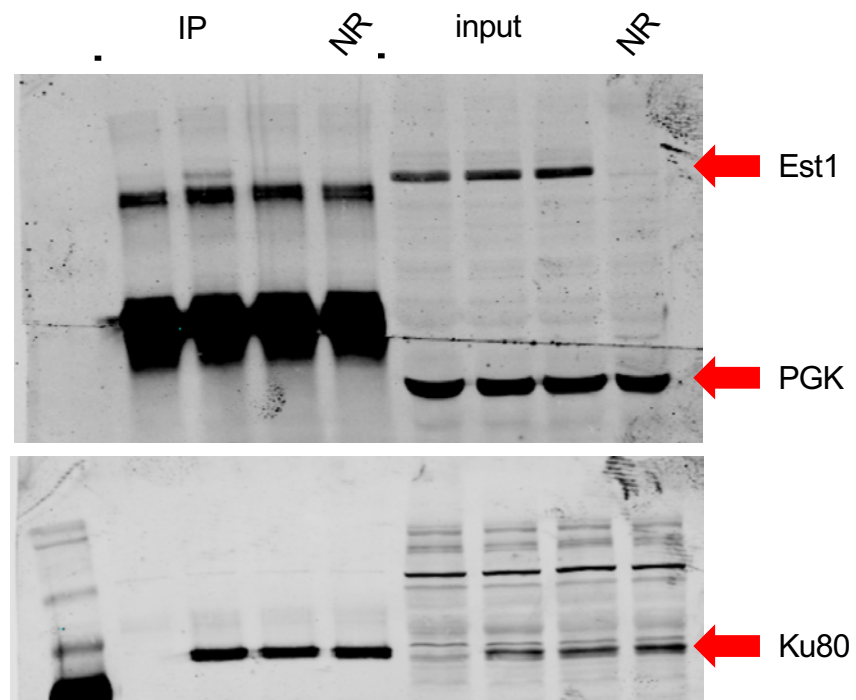

**Supplementary Figure S12.** Uncropped western blots shown in **Figure 5A**; NR indicates not relevant

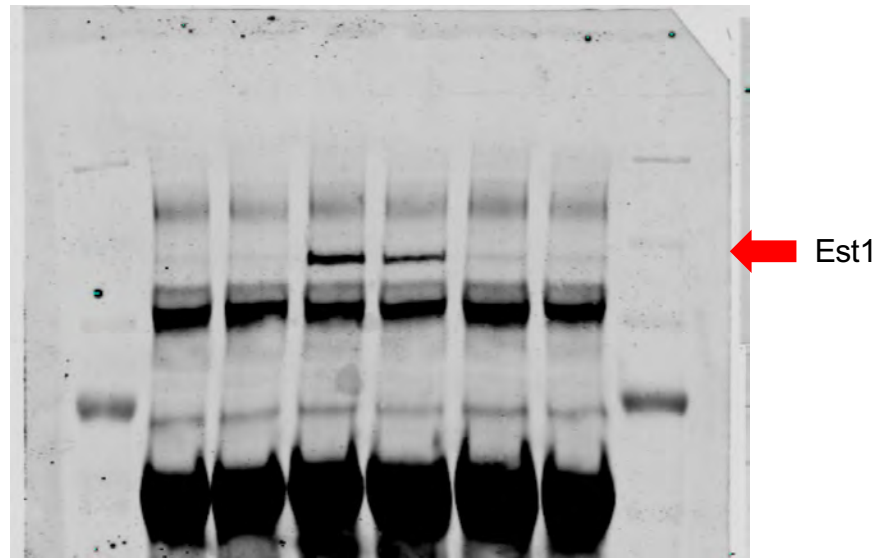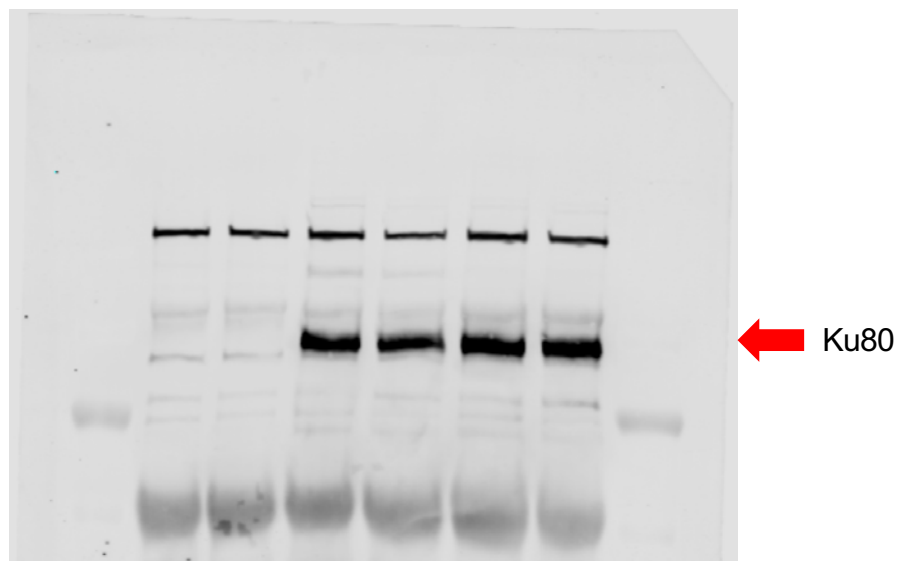

**Supplementary Figure S13.** Uncropped western blots shown in **Figure 5C**.

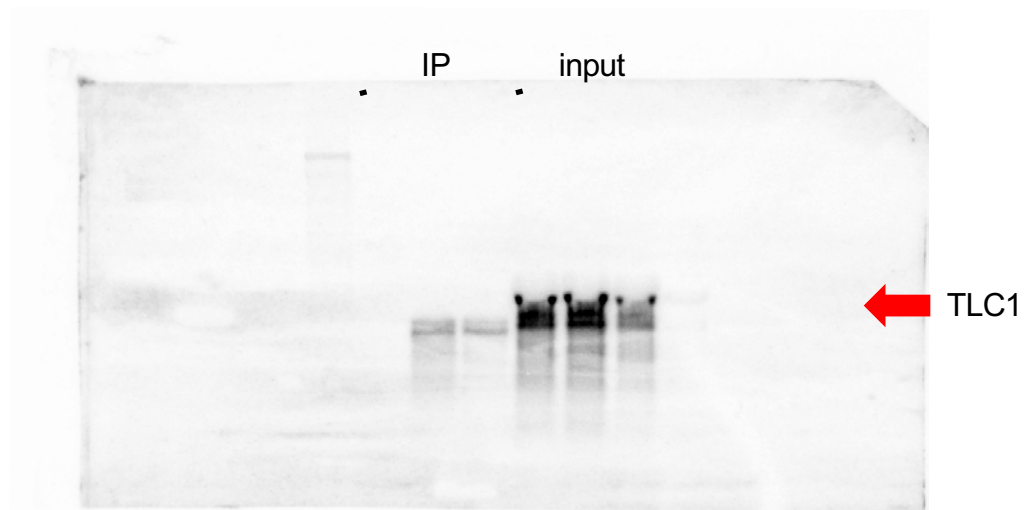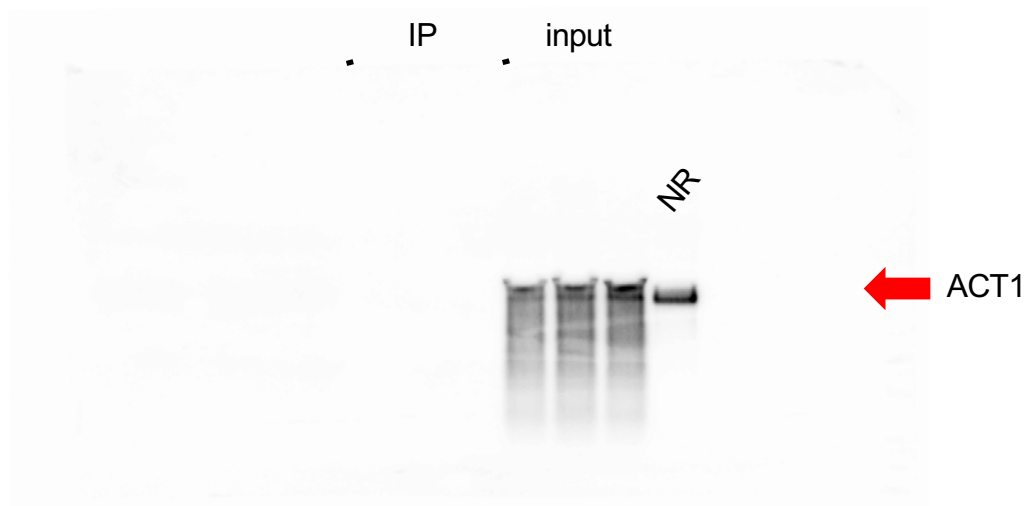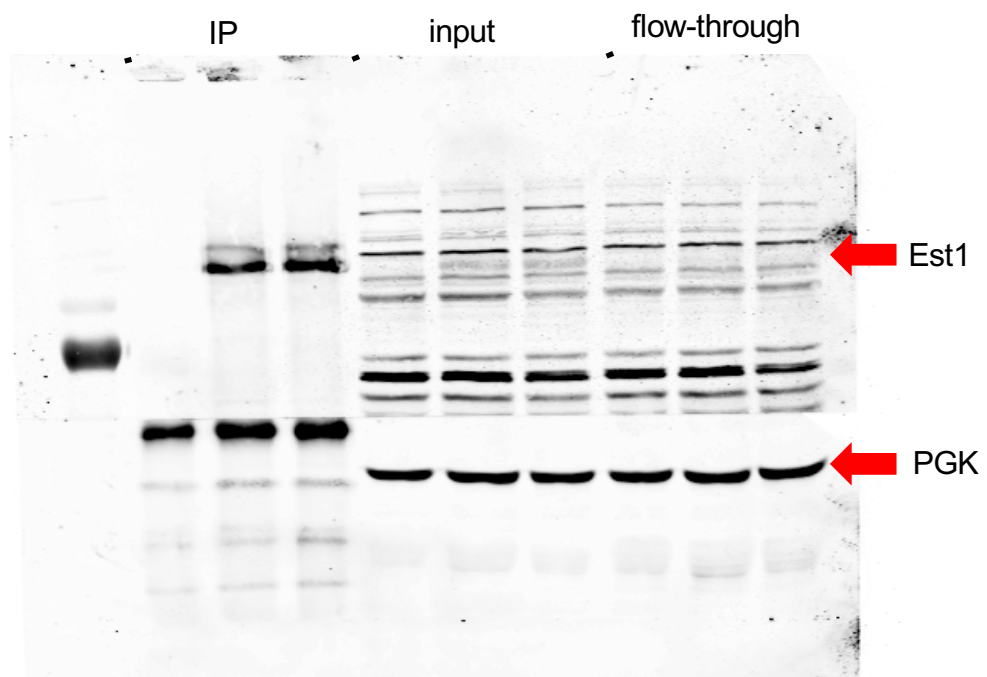

**Supplementary Figure S14.** Top: Uncropped northern blots shown in **Figure 5E**;  
 NR indicates not relevant  
 Bottom: Uncropped western blots shown in **Figure 5E**

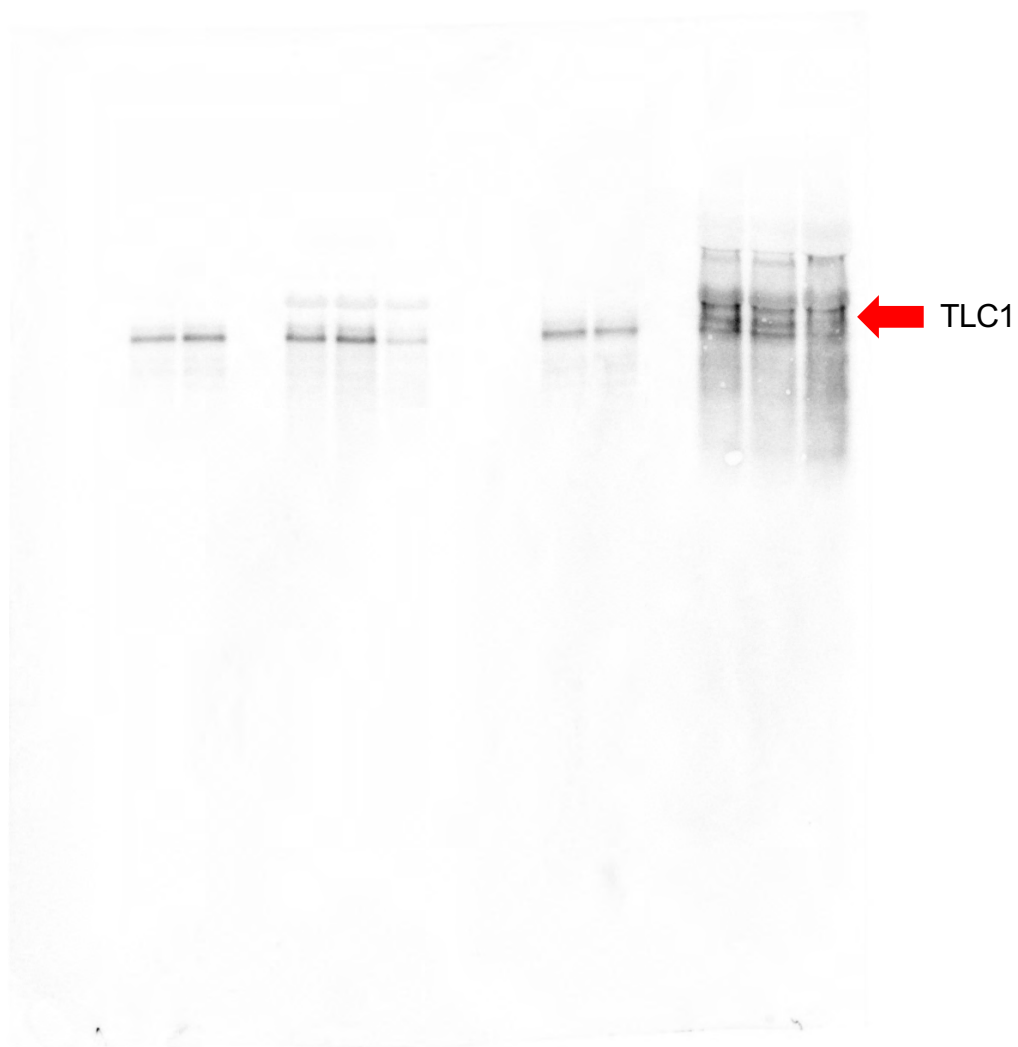

**Supplementary Figure S15A.** Uncropped northern blot shown in **Supplementary Figure S3**, which is representative of data quantified for **Figure 5H**.

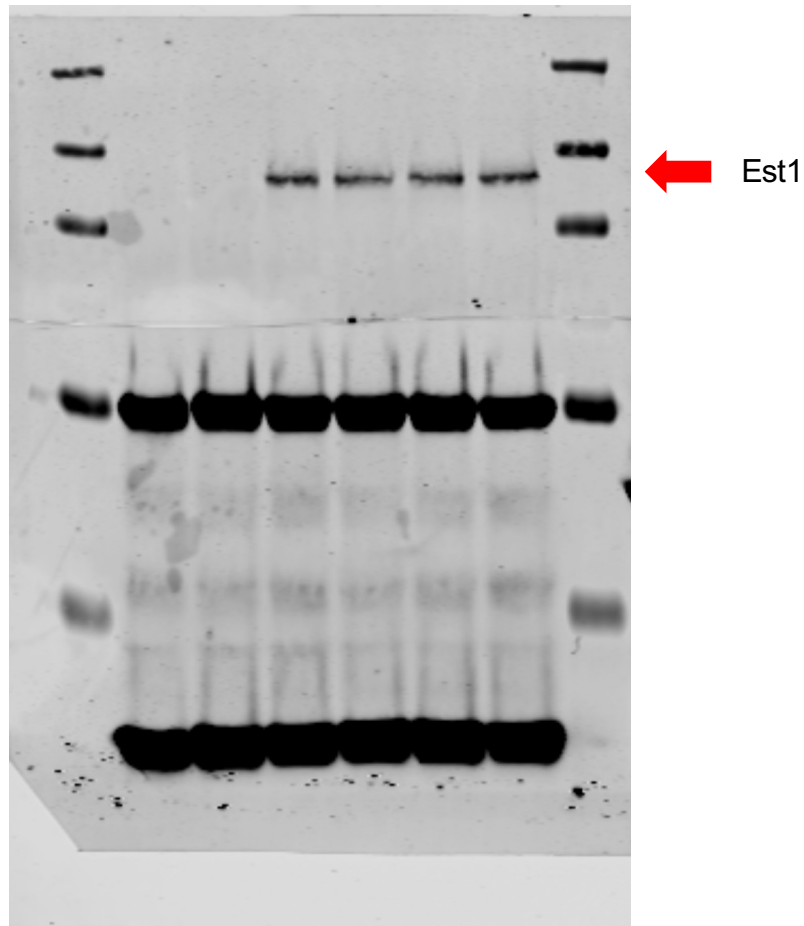

**Supplementary Figure S15B.** Uncropped western blot shown in **Supplementary Figure S3**, which is representative of data quantified for **Figure 5H**.

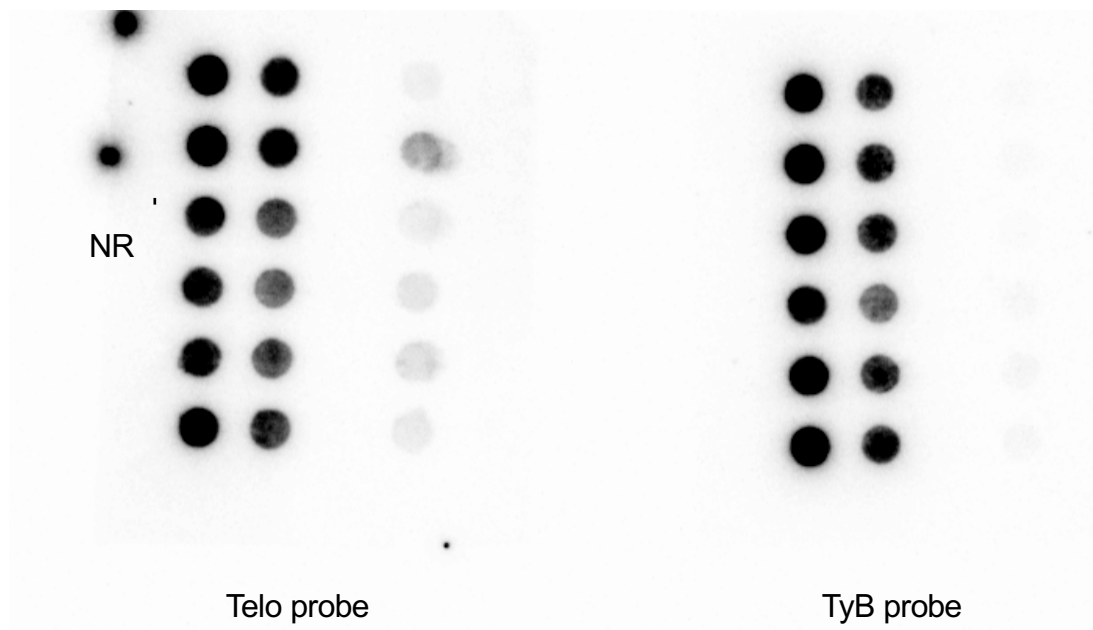

**Supplementary Figure S16.** Uncropped dot blots shown in **Figure 6A**; NR indicates not relevant.

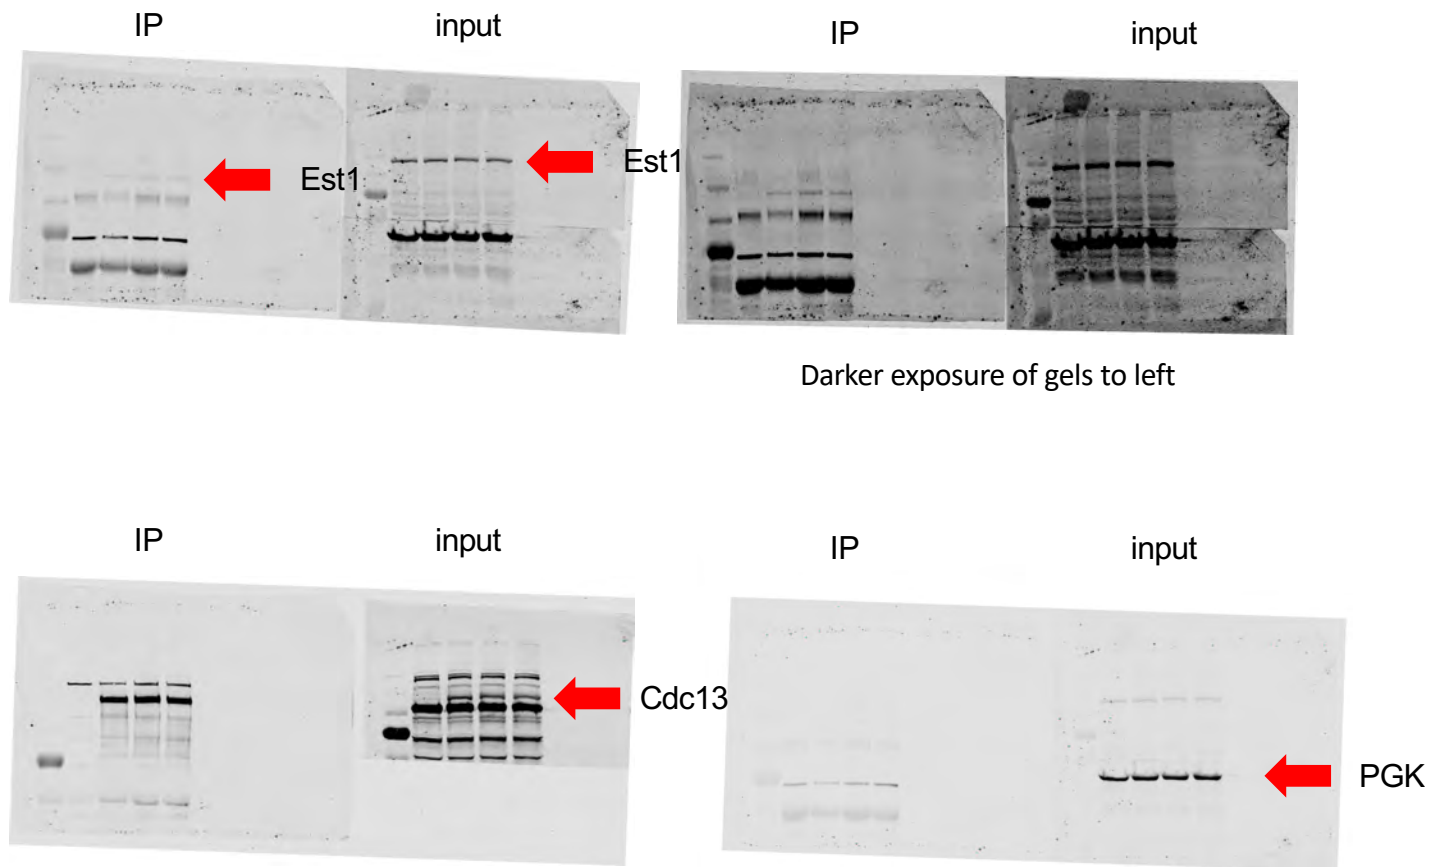

**Supplementary Figure S17A.** Uncropped top set of western blots shown in **Figure 7A**; NR indicates not relevant

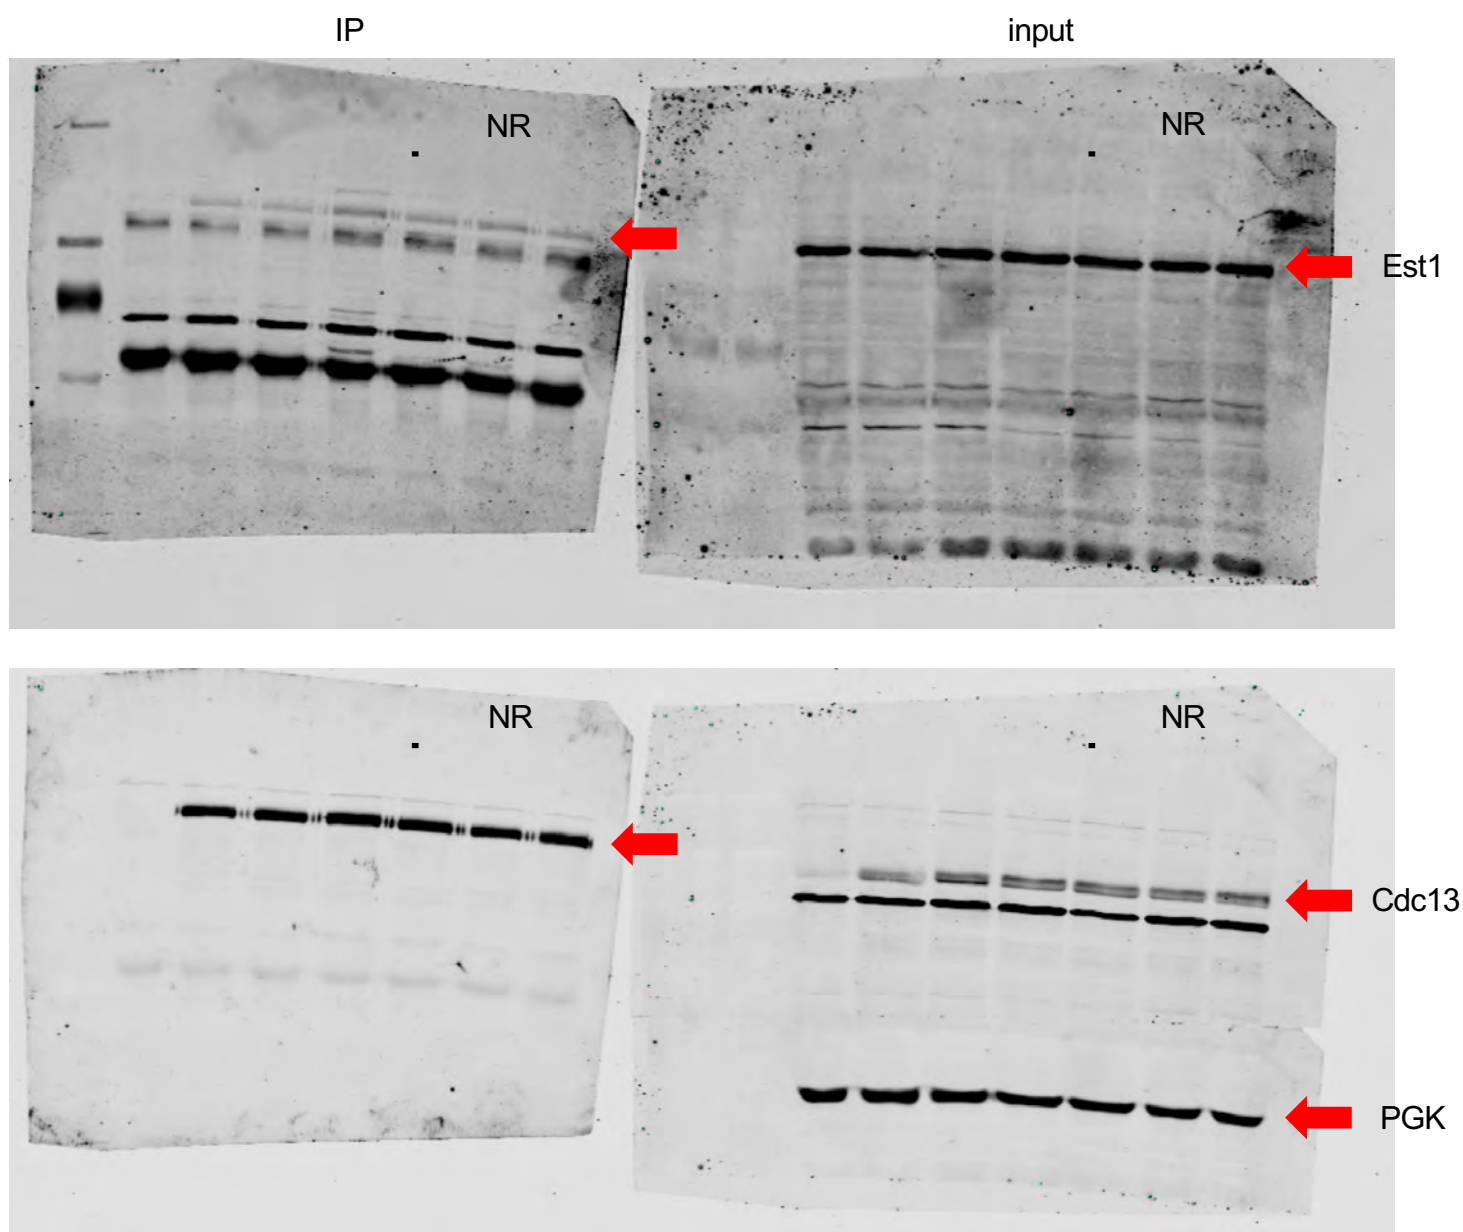

**Supplementary Figure S17B.** Uncropped bottom set of western blots shown in **Figure 7A**; NR indicates not relevant

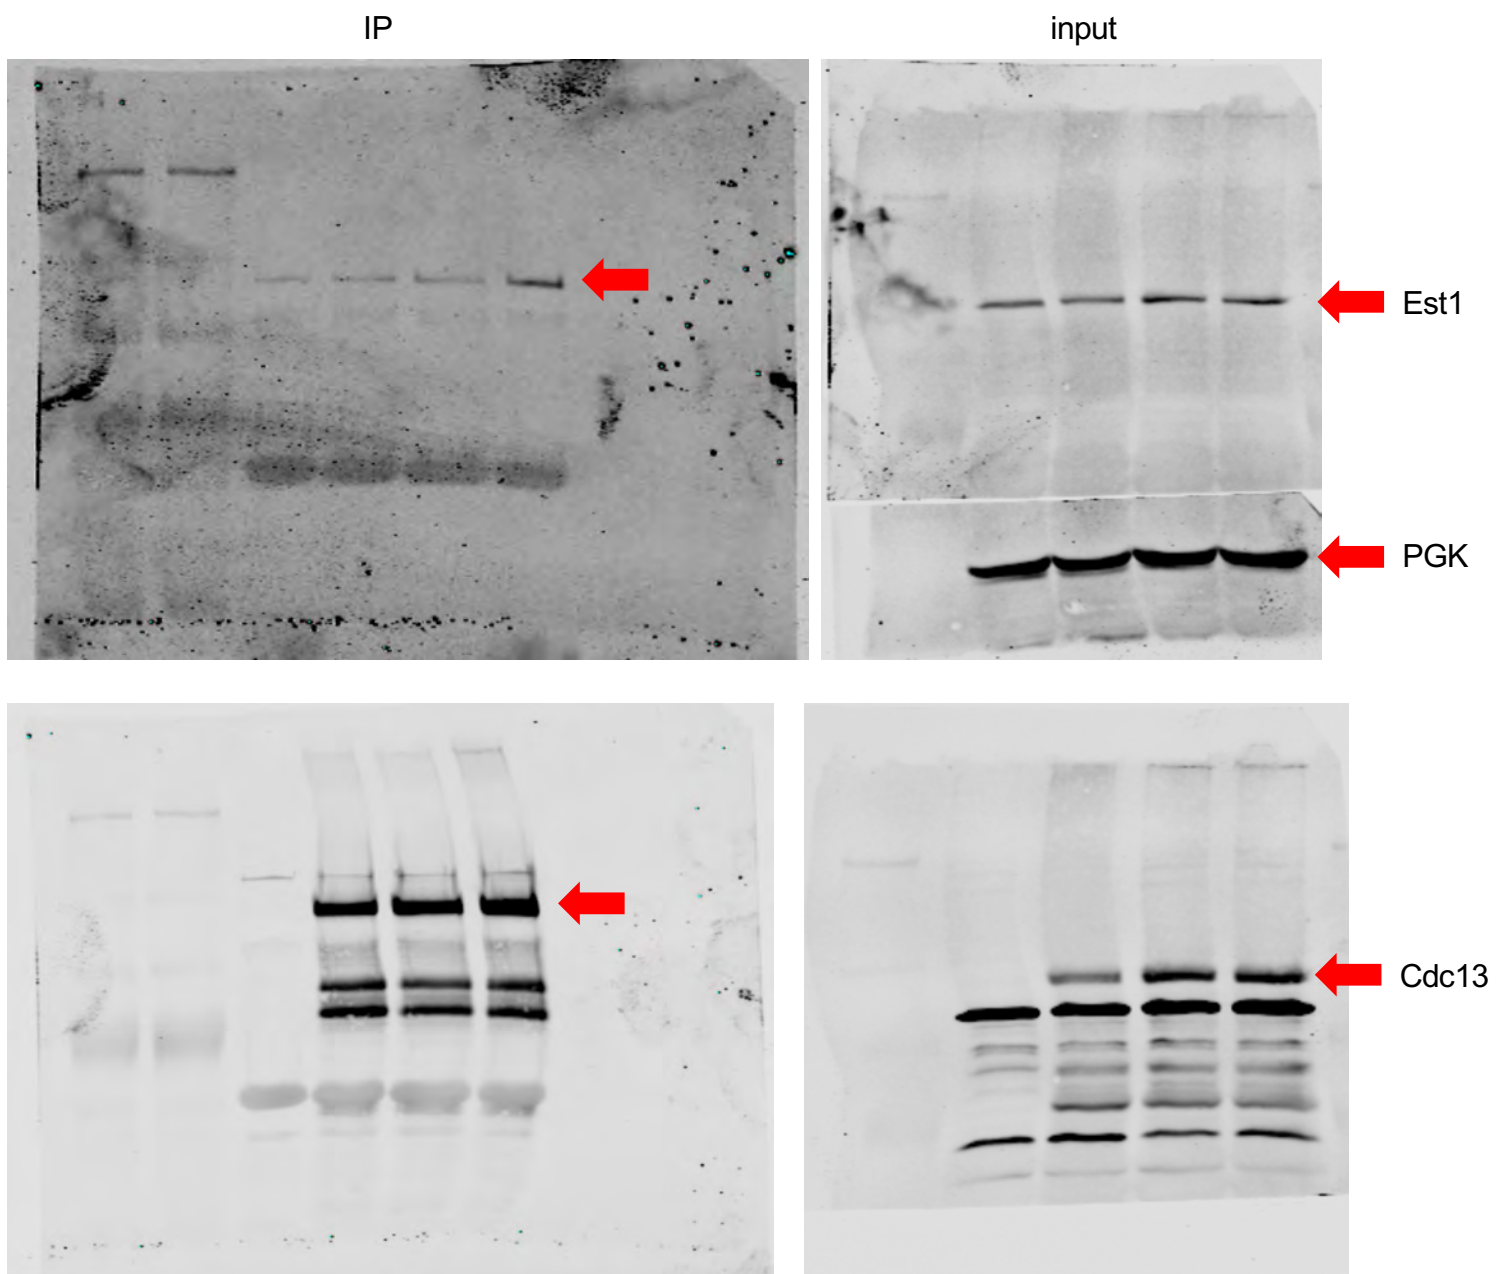

**Supplementary Figure S18.** Uncropped western blots shown in **Figure S4**.
